# Supplementary material for: Degradable Nanogels Based on Poly[Oligo(Ethylene Glycol) Methacrylate] (POEGMA) Derivatives through Thermo-Induced Aggregation of Polymer Chain and Subsequent Chemical Crosslinking
Source: MDPI journal article supplement (doi:10.3390/polym16081163), 2024-04-20
Supplement: s1 [file s1]

## SUPPORTING INFORMATION

### Degradable nanogels based on POEGMA derivatives through thermo-induced aggregation of polymer chain and subsequent chemical crosslinking

Katarzyna Filipek, Łukasz Otulakowski, Katarzyna Jelonek, Alicja Utrata-Wesołek\*

*Centre of Polymer and Carbon Materials, Polish Academy of Sciences, M. Curie-Skłodowskiej 34, Zabrze, 41-819, Poland*

\*Corresponding author: Alicja Utrata-Wesołek; e-mail: [autrata@cmpw-pan.pl](mailto:autrata@cmpw-pan.pl); tel.: +48-32-271-077 (ext. 261)

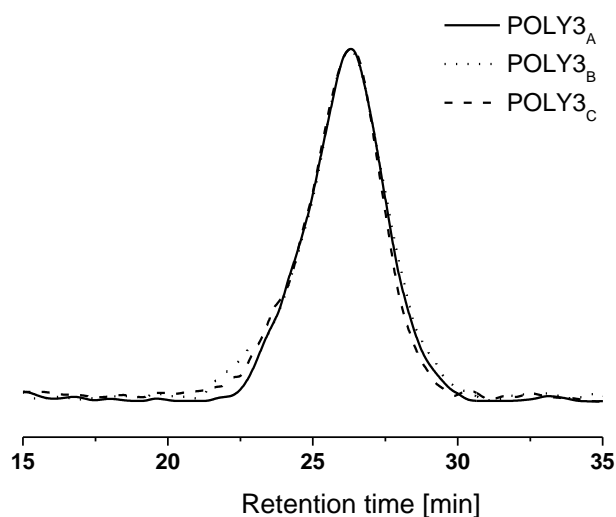

**Figure S1.** GPC-MALLS chromatograms for a representative poly[oligo(ethylene glycol) methacrylate] (POLY 3<sub>A</sub>), its derivative containing OLA (POLY 3<sub>B</sub>) and derivative containing OLA ended with acrylate groups (POLY 3<sub>C</sub>).

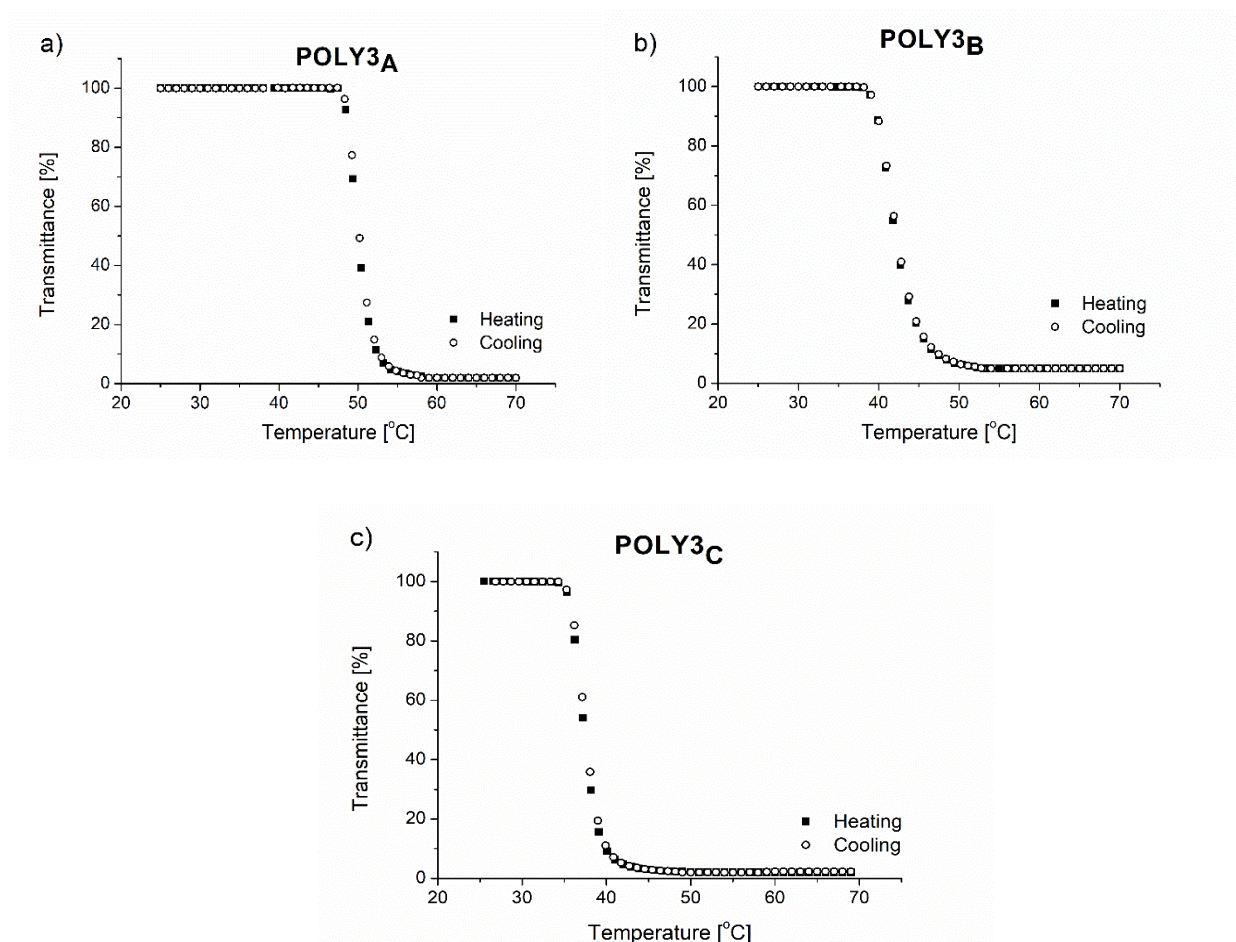

**Figure S2.** The heating-cooling cycles for (a) POLY 3<sub>A</sub>, (b) POLY 3<sub>B</sub>, (c) POLY 3<sub>C</sub> solutions in water (1 mg/mL).

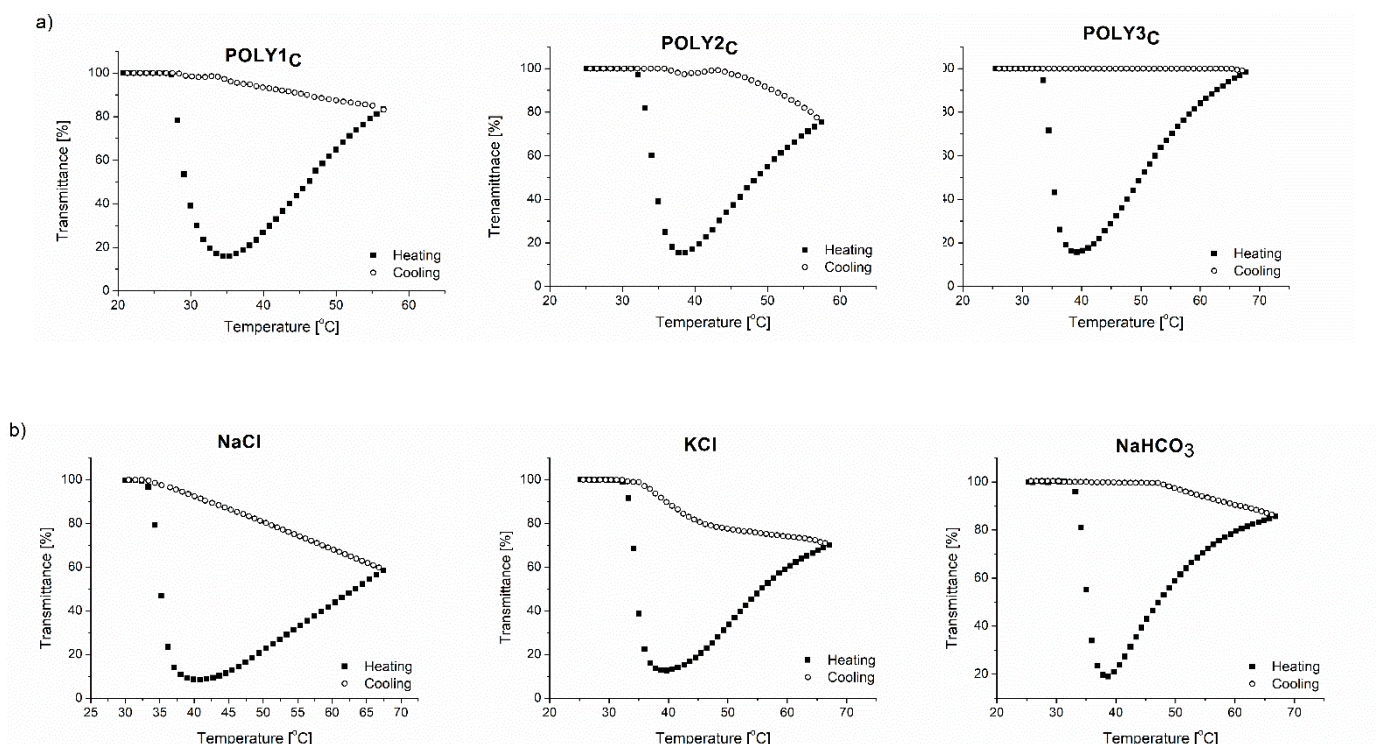

**Figure S3.** The heating-cooling cycles for (a) various POEGMA copolymers modified with OLA and acrylates in DMEM; (b) POLY 3<sub>c</sub> copolymer in different salts.
